1 **Coordination during group departures and group progressions in the tolerant**  
2 **multilevel society of wild Guinea baboons (*Papio papio*)**

3

4 Davide Montanari<sup>1</sup>, Julien Hambuckers<sup>2,3</sup>, Julia Fischer<sup>1,4,5\*</sup> & Dietmar Zinner<sup>1,4\*</sup>

5

6 <sup>1</sup>Cognitive Ethology Laboratory, German Primate Center, Kellnerweg 4, 37077 Göttingen, Germany

7 <sup>2</sup>HEC Liège, University of Liege, Liège, Belgium

8 <sup>3</sup>Chair of Statistics, Georg-August-University of Göttingen, Humboldtallee 3, 37073 Göttingen,

9 Germany

10 <sup>4</sup>Leibniz-ScienceCampus Primate Cognition, Göttingen

11 <sup>5</sup>Department of Primate Cognition, Georg-August-University of Göttingen, Göttingen, Germany

12

13 Correspondence to: Dietmar Zinner, Cognitive Ethology Laboratory, German Primate Center,

14 Kellnerweg 4, 37077 Göttingen, Germany. E-mail: [dzinner@gwdg.de](mailto:dzinner@gwdg.de) Tel: +49 551 3851-129

15 \* shared last authorship

16

17 **Running title**

18 Group coordination in Guinea baboons

19

20 **Research Highlights**

21

- 22 • In wild Guinea baboons, both adult males and females initiated group departures
- 23 • Initiators signaled during departures, but this did not affect initiation success
- 24 • Solitary males were predominantly found at the front during group progression

25

26 **Abstract**

27 **Objectives:** Most primate species live in groups, and temporal and spatial coordination of activities of  
28 individuals is essential for maintaining group cohesion, and there is still considerable debate to which  
29 degree social organization, the extent of despotism, and resource distribution shape group  
30 coordination processes. As different baboon species exhibit considerable variation in all of these  
31 factors, they constitute an excellent test case to resolve this debate.

32 **Materials and Methods:** We analyzed group departures and progressions of Guinea baboons, *Papio*  
33 *papio*, in the Niokolo Koba National Park in Senegal. Guinea baboons live in a multi-level society with  
34 strong male bonds and a lack of a clear dominance hierarchy between males.

35 **Results:** Two-thirds of departures were initiated by adult males, and one third by adult females.  
36 Although initiators were more likely to signal than followers, signaling did not affect the initiation  
37 success. During group progression, males that were not affiliated with females were predominantly  
38 found in the front, while affiliated males, females and young were observed more frequently closer  
39 to the center of the group, and no preferences for rear positions. Overall, affiliated subjects were  
40 more likely to depart and travel together.

41 **Discussion:** The group departures in Guinea baboons differed strikingly from the elaborate  
42 ‘negotiation’ behaviors among male hamadryas baboons, *Papio hamadryas*. We did not observe that  
43 specific individuals dominated the group coordination. Neither social organization, variation in  
44 despotism, nor resource distribution alone explain variation between species. Future studies should  
45 test whether specific combinations of factors promote the occurrence of negotiation processes.

46

47 **KEYWORDS**

48 Guinea baboons, group coordination, social organization, resource distribution

49

## 50 **1 INTRODUCTION**

51 Taking advantage of the benefits of group living requires the temporal and spatial coordination of  
52 activities of individuals (Conradt & Roper, 2003; King & Cowlishaw, 2009; Krause & Ruxton, 2002).  
53 The coordination of individual movements in particular is essential for maintaining group cohesion  
54 (Couzin, Krause, Franks & Levin, 2005; Petit & Bon, 2010; Westley, Berdahl, Torney & Biro, 2018).  
55 These coordination processes differ between species and contexts. Many of the coordination  
56 patterns seen in swarms, flocks and certain social groups such as desert locusts, *Schistocerca*  
57 *gregaria* (Bazazi et al., 2008), European starlings, *Sturnus vulgaris* (Ballerini et al., 2008), three-spined  
58 sticklebacks, *Gasterosteus aculeatus* Jolles, Boogert, Sridhar, Couzin & Manica, 2017), but also some  
59 mammal species (e.g., herds of domestic sheep, *Ovis aries*, Toulet, Gautrais, Bon, & Peruani, 2015)  
60 can be explained by simple rules characterizing the attraction, alignment, repulsion and mimetism  
61 between neighboring individuals (Couzin & Krause, 2003; Deneubourg & Goss 1989; Sueur &  
62 Deneubourg, 2011). However, especially in socially complex societies, several other factors can  
63 modulate group coordination mechanisms and processes, such as individual traits (Couzin et al.,  
64 2011; del Mar Delgado et al., 2018), heterogeneous social relationships (Nagy, Ákos, Biro & Vicsek,  
65 2010), or landscape features (Strandburg-Peshkin, Farine, Crofoot & Couzin, 2017).

66 To investigate how group coordination arises from individual decisions, most studies focused  
67 on the initiation of collective movements after the group had been stationary for a while (e.g.,  
68 Kummer 1968a; Stueckle & Zinner, 2008). Key questions here are who attempts to initiate group  
69 movements and whether attempts are successful, i.e. whether other group members follow and in  
70 which order (e.g., Black, 1988; Lorenz, 1931; Stolba, 1979; Sueur & Petit, 2008a,b; Walker, King,  
71 Mcnutt & Jordan, 2017). In some species, the initiation of group movements is highly biased towards  
72 certain individuals, often dominant or old and experienced group members (e.g., mountain gorillas,  
73 *Gorilla beringei beringei*, Watts, 2000; bottlenose dolphins, *Tursiops* sp., Lusseau & Conradt, 2009).  
74 Such cases have been described as consistent leadership (Conradt & Roper, 2005; Pyritz, King, Sueur  
75 & Fichtel, 2011a; Strandburg-Peshkin, Papageorgiou, Crofoot & Farine, 2018). In other species,  
76 initiation attempts are distributed among many or all (often only adult) group members (e.g.,  
77 meerkats, *Suricata suricata*, Bousquet, Sumpter & Manser, 2011; white-faced capuchins, *Cebus*  
78 *capucinus*, Leca, Gunst, Thierry & Petit, 2003). These cases have been characterized as distributed or  
79 variable leadership (Conradt & Roper, 2005; Pyritz et al., 2011a; Strandburg-Peshkin et al., 2018).

80 The propensity to initiate group movements can be affected by individual, social or  
81 environmental factors (Farine, Strandburg-Peshkin, Couzin, Berger-Wolf, & Crofoot, 2017). Initiators  
82 often belong to specific age and sex-classes. For instance, old female bonobos, *Pan paniscus*  
83 (Tokuyama & Furuichi, 2017) or adult female European bison, *Bison bonasus* (Ramos, Manizan,  
84 Rodriguez, Kemp & Sueur, 2018) initiate the majority of movements. Individual physiological needs

85 can also modulate the initiation process: lactating plain zebra females (*Equus burchellii*) initiate  
86 collective movements more frequently than non-lactating females (Fischhoff et al., 2007). Bolder  
87 individuals may initiate group movements more often than shy group members (e.g., domestic  
88 horses, *Equus ferus caballus*, Briard, Dorn, & Petit, 2015; red-fronted lemurs, *Eulemur rufifrons*,  
89 Sperber, 2018). In groups where power differentials play an important role, that is in more despotic  
90 societies, high ranking subjects are more likely to initiate group movement (e.g., despotic rhesus  
91 macaques, *Macaca mulatta*, than in more egalitarian Tonkean macaques, *Macaca tonkeana*, Sueur &  
92 Petit, 2008a). The social organization (uni-level vs. multi-level) is also expected to modulate group  
93 coordination processes (Fischhoff et al., 2007; Ozogány & Vicsek, 2015; Sueur et al., 2011). Finally,  
94 environmental heterogeneity could modulate the propensity to initiate a group movement as it  
95 modulates collective behavior in a variety of ways (e.g., Bonnell, Henzi & Barrett, 2019; King et al.,  
96 2018; Strandburg-Peshkin et al., 2017).

97 Baboons (genus *Papio*) are an intriguing model to study the impact of social factors on group  
98 coordination, as they exhibit considerable variation in mating system, social organization and social  
99 structure (Anandam et al., 2013; Fischer et al., 2017; Swedell, 2011). Olive (*P. anubis*), yellow (*P.*  
100 *cynocephalus*), chacma (*P. ursinus*) and Kinda baboons (*P. kindae*) usually live in a uni-level,  
101 multimale-multifemale group (Anandam et al., 2013). Their societies reveal a linear rank hierarchy,  
102 determined through agonistic interactions in males and inherited in females (Anandam et al., 2013;  
103 Barrett & Henzi, 2008; Swedell, 2011). Hamadryas (*P. hamadryas*) and Guinea baboons (*P. papio*), in  
104 contrast, live in multilevel societies based on monandric-polygynic reproductive units (one-male units  
105 or OMUs) at the base of the societies (Fischer et al., 2017; Goffe, Zinner & Fischer, 2016; Kummer,  
106 1968a,b; Patzelt et al., 2014; Pines & Swedell, 2011; Schreier & Swedell, 2009). Thus, baboons  
107 provide a useful model to compare group coordination in uni-level and multi-level societies.

108 Studies of group coordination in uni-level baboon societies have shown heterogeneous results.  
109 In some groups, dominant males predominantly initiated and directed troop movements (chacma  
110 baboons, Byrne, Whiten & Henzi 1990; Stoltz & Saayman, 1970; but see Buskirk, Buskirk & Hamilton,  
111 1974). In a further study of chacma baboons, adult males were more likely to initiate group  
112 movements but the likelihood of being successful was similar for males and females (Stueckle &  
113 Zinner, 2008). However, when provided with incentives, the dominant male led groups to  
114 experimental food patches (King et al., 2008). In olive baboons at Gombe, the highest-ranking male  
115 was also more likely to determine the direction and timing of group movements than lower ranking  
116 subjects (Ransom, 1981), whereas in Queen Elizabeth National Park high ranking males often  
117 attempted to initiate a group movement, but they were only successful when old females followed  
118 him (Rowell, 1969). A similar impact of high-ranking females has been observed in yellow baboons in  
119 Mikumi National Park (Norton, 1986). A recent study in which olive baboons were tracked with a

120 high-resolution global positioning system revealed a process of shared decision-making  
121 characterizing group movement. Rather than preferentially following dominant individuals, these  
122 baboons were more likely to follow when multiple initiators agreed (Strandburg-Peshkin, Farine,  
123 Couzin & Crofoot, 2015).

124 In hamadryas baboons, which live in a multi-level society (Grueter & Zinner, 2004; Kummer,  
125 1968a), the reproductive males of the OMUs almost exclusively initiated group movements, while  
126 females had only a little impact on group coordination (Kummer, 1968a, 1995; Stolba, 1979). In  
127 subgroups of two OMUs, Kummer (1968a) described the decision making process as a “negotiation”  
128 among males with different roles, the initiator and the decider male (ID-system). Initiators moved  
129 away from the center of the band followed by their females. If another male (decider) from the band  
130 did not follow, the initiator moved back to the center. The ID-system was, however, not confirmed in  
131 a subsequent study on the same population, when larger social entities were taken into account (e.g.  
132 clans, bands; Stolba, 1979).

133 Guinea baboons live in a similar multi-level social organization as hamadryas baboons. If the  
134 social organization affects decision making, one could expect a similar strong impact of OMU males  
135 on the initiation of collective movements as in hamadryas baboons. However, Guinea baboon males  
136 are socially more tolerant than hamadryas baboon males and Guinea baboon females are not as  
137 strictly controlled by their males (Fischer et al., 2017; Kummer, 1968a), which might also affect the  
138 females’ role in initiation collective movements. Thus, if the socially more tolerant style modulates  
139 the decision-making process during group departures, one would expect that females take a share in  
140 the initiation of group movement.

141 In both types of baboon social organization, individuals appear to preferentially follow closely  
142 affiliated group members, irrespective of who initiates a group movement (olive baboons, Farine et  
143 al., 2016; chacma baboons, King et al., 2008, 2011). In hamadryas baboons the departure process  
144 relies on unit member cohesiveness (Kummer, 1968a, 1995). We therefore expected that the  
145 relationship strength affects who is likely to follow whom during group departures, with animals  
146 having stronger relationships being more likely to depart in close succession.

147 We additionally investigated the function of signals in group departures. Signals are conceived  
148 as indicators of specific behavioral dispositions (Fischer & Price, 2017). Thus, subjects who are  
149 motivated to initiate a group movement should express this motivation using signals (e.g., bonobos,  
150 *Pan paniscus*, Schamberg, Cheney & Seyfarth, 2017). We therefore predicted that subjects who  
151 initiated group departures were more likely to signal compared to individuals whom we classified as  
152 followers. We furthermore predicted that subjects who signaled may indicate a greater decisiveness  
153 to initiate group movement, and therefore might be more successful in recruiting followers.

154 In the second part of this study, we investigated progression order. We focused on situations  
155 when the baboons moved in more or less a single-file. The progression order has been regarded as  
156 an adaptation to predation risk ( DeVore & Washburn, 1963; Rhine, 1975; Rhine, Forthman, Stillwell-  
157 Barne, Westlund & Westlund, 1981; Rhine, Bioland, & Lodwick, 1985). DeVore and Washburn (1963)  
158 reported a socio-spatial order in which the most vulnerable group members (adult females, juveniles  
159 and infants) took central positions close to the dominant adult males, whereas low-ranking adult  
160 males and older immature males occupied the more risk prone positions in the front and rear of the  
161 progression. However, this male-centered order was not observed in other baboon populations  
162 (Altmann, 1979; Rowell, 1969; Harding, 1977; Rhine, 1975; Rhine & Westlund, 1981; Rhine et al.,  
163 1985; Rhine & Tilson, 1987). For multi-level hamadryas baboons, Kummer (1968a) reported that the  
164 frequency with which adult and subadult males appeared at the front was twice that which would be  
165 expected by chance, whereas males were found at the rear with a frequency equal to chance.

166 Regarding group progressions, we therefore contrasted two possible scenarios: if Guinea  
167 baboons conform to other baboon species, adult males should be found more frequently in front and  
168 rear positions, while adult females and youngsters should mainly travel in the middle of the  
169 progression. Alternatively, units may retain their cohesiveness during group movement. In this case,  
170 the progression would resemble the male centered pattern with primary unit males moving with  
171 their females and offspring in the center of a progression.

172

## 173 **2 MATERIALS AND METHODS**

### 174 **2.1 Field site and study subjects**

175 The fieldwork was conducted in the surroundings of the field station “Centre de Recherche de  
176 Primatologie (CRP) Simenti” (13°01’34” N, 13°17’41” W), in the Niokolo-Koba National Park, south-  
177 eastern Senegal. The multi-level system of Guinea baboons consists of “units” (usually one adult  
178 male and one to several females with their young), units are nested within “parties” and parties are  
179 nested within “gangs” (Fischer et al., 2017). The study subjects were fully habituated baboons  
180 belonging to five parties, that formed two gangs (Table 1). Subjects were individually identified,  
181 although the identification of juveniles was not always possible. The home ranges of the parties  
182 covered on average 30.3 km<sup>2</sup> of largely overlapping territories (Kernel density estimations 95%,  
183 unpubl. data, M. Klapproth).

184

185 **Table 1.** Average composition of study groups. Party sizes (i.e. total number of party members)  
186 varied due to births, deaths, disappearances, between-parties transfers of individuals and difficulties  
187 in recognizing young weaned individuals.  
188

| Gang      | Party | Number of units | Number of adults |      | Size |
|-----------|-------|-----------------|------------------|------|------|
| "Mare"    | "4"   | 2-3             | 5 ♂              | 3 ♀  | 15   |
|           | "9"   | 5-6             | 12 ♂             | 17 ♀ | 45   |
|           | "10"  | 1-2             | 2 ♂              | 2 ♀  | 8    |
| "Simenti" | "5"   | 3-4             | 10 ♂             | 9 ♀  | 25   |
|           | "6"   | 4-5             | 12 ♂             | 11 ♀ | 38   |

189

190

## 191 2.2 Data collection

192 Data collection was conducted from January to August, in 2016 and 2017, for a total of 16 months, 6  
193 days per week. Observation days started before sunrise (at 6:00 or 6:30) to locate the baboons at the  
194 sleeping site. Data were recorded on Samsung Note 3 handhelds using forms created with Pendragon  
195 7.2 (Pendragon Software Corporation, USA). Every day, all researchers working at CRP collect census,  
196 ad libitum, scan, and focal data of the baboons to investigate the demography, reproductive success,  
197 association data, and behavioral patterns (Altmann, 1974). These data were used to determine  
198 female-male associations. Data on group movement were collected with the all-occurrence sampling  
199 method (Altmann, 1974). Two types of events were distinguished during the group movement  
200 process: group departures and group progressions (see below). We classified individuals according to  
201 age (Category "young" including infants, yearlings, and juveniles; Category "adult" including  
202 subadults and adults) and sex. We further noted the unit identity for primary males and the  
203 associated members of the unit. Non-primary adult males (i.e. secondary and unaffiliated ones) and  
204 young individuals which could not be unambiguously identified as members of one unit were labelled  
205 by their own IDs. In addition we considered the unit size (number of adult subjects). Non-associated  
206 animals had a unit size of 1, units comprised of an adult male and one female had a size of 2, and so  
207 on. The largest unit size was 7.

208

### 209 2.2.1 Operational definition of group departures

210 A group departure occurred when a group of baboons was collectively leaving a confined area where  
211 they had been stationary for a set time. We collected data on events of group departures throughout  
212 the day, whenever visibility allowed it and certain conditions were met. Specifically, the group had to  
213 consist of one or more complete units or a complete party. The confined area where the individuals  
214 stayed stationary before a group departure was named the pre-departure area. The size of the pre-  
215 departure area was 20 m in diameter at maximum. The individuals had to be isolated from  
216 conspecifics outside the area for at least 20 m. The individuals had to stay stationary, either feeding,

217 resting, or socializing in the pre-departure area for at least 15 minutes, to ensure a certain degree of  
218 independence in timing and direction from previous movements (comparably to e.g., Leca et al.,  
219 2003; Pyritz, Kappeler & Fichtel 2011b; Seltmann, Majolo, Schülke & Ostner, 2013; Sueur & Petit,  
220 2008a,b). We excluded movements prompted by predation risks, alarm calls or social interactions  
221 such as threats or chases. When these conditions were met, the identity of all individuals moving  
222 away from the pre-departure area and the starting time and the direction of their movements were  
223 voice recorded.

224 The first individual leaving the area was defined as attempting an initiation of group departure.  
225 The individuals moving away from the pre-departure area in the same direction as another one  
226 before, within a 5-minute interval time, were considered followers. When an individual was heading  
227 more than 45° to the left or right from the direction chosen by the previous individual, and/or was  
228 starting to move away more than 5 minutes after the previous individuals, it was coded as  
229 attempting another initiation of group departure. Therefore, an initiation attempt was coded as  
230 successful when some or all individuals in the pre-departure area followed. All individuals of the  
231 subject group were hence classified as successful initiators, unsuccessful initiators, or followers.  
232 Unsuccessful initiators were subsequently coded either as followers, successful initiators or again as  
233 unsuccessful initiators on the following initiation attempt. When two successful initiations were  
234 coded in one event, this implied group fission.

235 We furthermore recorded whether any one of the following signals occurred, to test whether  
236 they signaled the readiness to initiate a group departure or affected the likelihood to succeed in  
237 initiation:

- 238 • Back glance: once the individual has started to move away from the pre-departure area and it  
239 looks back in the direction of other group members. Empirically defined as the turn of the head  
240 of more than 90° towards the direction of the pre-departure area.
- 241 • Branch shaking display: rapid repeated bouncing in place while the individual stands  
242 quadrupedal grasping a flexible branch, shaking it (Mehlman, 1996).
- 243 • Pause: once the individual has started to move away from the pre-departure area and it stops  
244 moving for more than 2 seconds within the first 20 m of movement.
- 245 • Vocalizations: individual call, classified per type: keck, grunt, roar grunt, scream, bark, wahoo  
246 (Fischer et al., 2017; Maciej, 2013).
- 247 • Greeting: “exchange of non-aggressive signals that consist of species-specific behavioral  
248 patterns, [...] ranging from touches and embraces to genital manipulation and same-sex  
249 mounts” (Dal Pesco & Fischer, 2018, p. 88).

250

251



## 252 **2.2.2 Operational definition of group progressions**

253 A group progression was defined as the instance when a group of travelling baboons was positioned  
254 in an approximate single-file and jointly moved in (largely) the same direction. Single-file travel  
255 progressions typically occur along delineated pathways such as roads and on open areas. We  
256 collected data on events of group progressions throughout the day, whenever visibility allowed it and  
257 the following conditions were met: the progressing group had to consist of one or more complete  
258 parties and the first data regarding a group progression event had been collected at least 30 minutes  
259 after the end of a previous event. When these conditions were met, D.M. advanced a few meters in  
260 front of the moving group, stopped and set a virtual reference line on the ground in front of the  
261 arriving group. Whenever a baboon crossed this reference line, its identity and time of crossing (to  
262 the nearest second) were voice recorded.

263

## 264 **2.3 Data analyses**

265 All models and plots were fitted in R (version 3.5.0; R Core Team, 2018), using RStudio interface  
266 (version 1.1.383; RStudio Team, 2016). The only exception concerns the representation of posterior  
267 probability distributions of the order of group progression. These plots were created with MATLAB  
268 (version 9.4; The MathWorks, Inc., 2018).

269

### 270 **2.3.1 Group departures**

271 We first tested whether the likelihood of attempting an initiation of group departure was influenced  
272 by sex, age and/or unit size. To this end, we ran a Generalized Linear Mixed Model (GLMM; Baayen,  
273 2008) with a binomial response variable and logit link function. Sex, age and unit size were included  
274 as fixed effects, individual identity and event as random effects (both random intercept components)  
275 and time of the day as a polynomial predictor variable. To prevent any scaling issue, we applied a z-  
276 transformation of the time of the day. We used the function `glmer` provided by the R package `lme4`  
277 (version 1.1-17; Bates, Mächler, Bolker & Walker, 2015), setting the optimizer to 'bobyqa' to prevent  
278 convergence issues. To test if the full model fits better than a simpler alternative with a likelihood  
279 ratio test (Dobson, 2002), we compared the full model to the null model containing only the random  
280 effects and time. The p-values for the distinct effects were derived comparing the full model with the  
281 model reduced of the predictor of interest, using the function `drop1`, argument 'test' set to 'Chisq'.  
282 To obtain the confidence intervals for the different regression coefficients, we used a bootstrap  
283 procedure using the function `bootMer` provided by `lme4` (`nboots = 1000`). In a second step, with the  
284 same procedure, we tested whether the same set of independent variables was affecting the success  
285 of the initiation attempts.

286 In order to approximate distances between individuals and to investigate the individual spatial  
287 association within the party, we calculated interval times (to the nearest second) between dyads of  
288 individuals succeeding each other. We restricted the analysis to those 40 events where at least one  
289 complete party was present, and calculated interval times only for individually identified subjects  
290 (omitting most of the juveniles).

291 To test whether interval times were influenced by unit identity, we used a linear mixed model  
292 (LMM; Baayen, 2008) into which we included unit membership, that is, whether individuals belonged  
293 to the same unit as fixed effect, and the identity of the individual following, i.e. for which we  
294 calculated the interval time, as well as the event as random effects. The model was fitted using the  
295 function lmer of the R package lme4 (version 1.1-17; Bates et al., 2015). Because the interval times  
296 were highly skewed, they were log-transformed. We verified that the assumptions of normally  
297 distributed and homogeneous residuals were met by visually inspecting a qqplot and a plot of the  
298 residuals against the fitted values. Both plots indicated that the assumptions were met. We tested  
299 model stability by excluding subjects one by one from the dataset and comparing the model estimate  
300 outcomes of these subsets with those outcomes of the full dataset. This revealed no influential  
301 subjects. We tested whether the full model was significantly better compared to the null model, in  
302 which the fixed effect was omitted, with the R function anova (argument test 'Chisq'; Dobson, 2002;  
303 Forstmeier & Schielzeth, 2011). The models were fitted using Maximum Likelihood, rather than  
304 Restricted Maximum Likelihood, to allow for a likelihood ratio test (Bolker et al., 2009). The p-value  
305 for the fixed effect was based on a likelihood ratio test comparing the full with the reduced model,  
306 with the function drop1, argument 'test' set to 'Chisq' (Barr, Levy, Scheepers & Tily, 2013).

307

### 308 **2.3.2 Group progressions**

309 To test whether specific individuals would be preferentially found in specific parts of the group, we  
310 divided the sequence of individuals into equal thirds. We used a multinomial logit regression model  
311 with random intercepts (Fahrmeir, Kneib, Lang & Marx, 2013). Progression-location was coded into  
312 three categories (front, middle and rear), with the probability of belonging to the category  
313 conditioned on age (adult vs young) and on one variable with three terms: female, primary male,  
314 non-primary male ("f\_pm\_npm"). The model was estimated by means of Bayesian methods.  
315 Posterior densities of the regression coefficients were obtained from Markov-chain Monte Carlo  
316 (MCMC) procedures, using the R package MCMCglmm (Hadfield, 2010). From the resulting posterior  
317 samples of progression-location regression coefficients, we calculated the distribution of the relative  
318 frequency (i.e. the probability  $p$ ) to observe a progression-location  $k = 1, 2, 3$ , conditional on age =  
319 adult (ESM formula set 1), as well as the distribution of the relative frequency to observe  
320 progression-location  $k = 1, 2, 3$ , conditional on f\_pm\_npm = female (ESM formula set 2).

321 In addition, we ran a post-hoc test to investigate whether non-primary males were occupying  
322 edge positions during group progressions compared to primary males. To do this, we divided the  
323 sequence of individuals of the front third and the one of the rear third in two equal parts. We ran a  
324 GLMM with a binomial response variable and logit link function. We used the function `glmer`  
325 provided by the R package `lme4` (version 1.1-17; Bates et al., 2015). `f_pm_npm` was introduced as  
326 one fixed effect with three levels: female, primary male, non-primary male. Individual identity was  
327 included as a random effect. Model diagnostics were performed by creating scaled residuals through  
328 simulations from the fitted model with the function `simulateResiduals` (number of simulations: 1000),  
329 provided by the R package `DHARMA` (version 0.2.0; Hartig, 2017). We also plotted the residuals  
330 against the predicted response from the model, using the function `plotSimulatedResiduals`, provided  
331 by the R package `DHARMA`. The plot permits to detect deviations from uniformity in y-axis direction  
332 and performs a quantile regression, which provides 0.25, 0.50 and 0.75 quantile lines across the  
333 plots. Reported p-values for the individual effects were obtained from likelihood ratio tests  
334 comparing the full with the respective reduced models (R function `drop1`, Barr et al., 2013).

335 Finally, we investigated the spatial association within the progressing party to test whether  
336 interval times were influenced by unit membership, as for group departures. We measured the time  
337 differences between individuals to the nearest second and used the same procedure applied to the  
338 dataset of group departures. In brief, we used a linear mixed model (LMM; Baayen, 2008) into which  
339 we included unit membership, that is, whether individuals belonged to the same unit as a fixed  
340 effect, and the identity of the individual following, i.e. for which we calculated the interval time, as  
341 well as the event as random effects.

342

### 343 **3 RESULTS**

#### 344 **3.1 Group departures**

345 We collected data during 121 group departure events. Thirty-three events involved only one  
346 complete unit, 48 events involved more than one complete unit, and 40 events involved a complete  
347 party. In total, we sampled 146 attempts of group departure: 52 (35.6%) conducted by adult females,  
348 91 (62.3%) by adult males and 3 (2.1%) by juveniles. Twenty-three attempts of initiation were not  
349 successful (15.8%) (Table 2). In two events, the individuals in the departure area split during group  
350 departure, after two successful initiation attempts within the same event. Fifty-eight different  
351 individuals attempted to initiate a group departure: 28 different adult males, 27 different adult  
352 females and three different juveniles.

353

354 **Table 2.** Number of initiation attempts by adult females, adult males, and young in relation to the  
 355 level of social organization and initiation success.  
 356

| Level of social organization | initiation   | adult female | adult male | young |
|------------------------------|--------------|--------------|------------|-------|
| one unit                     | successful   | 15           | 16         | 2     |
|                              | unsuccessful | 4            | 1          | 0     |
| more units                   | successful   | 18           | 32         | 0     |
|                              | unsuccessful | 2            | 6          | 1     |
| party                        | successful   | 9            | 31         | 0     |
|                              | unsuccessful | 4            | 5          | 0     |

357  
 358 Overall, the predictors age and sex had a clear impact on the probability of attempting an  
 359 initiation of group departure (likelihood ratio test comparing full and null model:  $\chi^2 = 71.882$ ,  $df = 6$ ,  $P$   
 360  $< 0.001$ ). Being male and of adult age strongly increased the likelihood of attempting an initiation.  
 361 Within the different adult age categories, there was no difference in the likelihood to initiate a group  
 362 departure (Table 3, Figure 1).

363  
 364 **Table 3.** Effects of age and sex category, as well as unit size, and time of day on the likelihood of  
 365 attempting to initiate a group departure. Estimated coefficients, standard errors, confidence  
 366 intervals, and test statistics.  
 367

|                  | Estimate | Std. Error | CI <sub>lower</sub> | CI <sub>upper</sub> | $\chi^2$              | Df             | P                     |
|------------------|----------|------------|---------------------|---------------------|-----------------------|----------------|-----------------------|
| Intercept        | -6.113   | 0.793      | -7.385              | -4.898              | <sup>(1)</sup>        | <sup>(1)</sup> | <sup>(1)</sup>        |
| sex Male         | 1.047    | 0.231      | 0.625               | 1.533               | 14.865                | 1              | <0.001                |
| age Mature adult | 3.643    | 0.726      | 2.551               | 4.545               | 66.680 <sup>(2)</sup> | 4              | <0.001 <sup>(2)</sup> |
| age Old adult    | 3.878    | 0.766      | 2.619               | 5.022               | <sup>(2)</sup>        | <sup>(2)</sup> | <sup>(2)</sup>        |
| age Subadult     | 3.591    | 0.764      | 2.387               | 4.734               | <sup>(2)</sup>        | <sup>(2)</sup> | <sup>(2)</sup>        |
| age Young adult  | 3.399    | 0.745      | 2.249               | 4.389               | <sup>(2)</sup>        | <sup>(2)</sup> | <sup>(2)</sup>        |
| unit size        | 0.028    | 0.078      | -0.126              | 0.183               | 0.122                 | 1              | 0.727                 |
| z.time           | 0.104    | 0.101      | -0.108              | 0.317               | <sup>(1)</sup>        | <sup>(1)</sup> | <sup>(1)</sup>        |
| l(z.time^2)      | -0.057   | 0.063      | -0.237              | 0.052               | 0.877                 | 1              | 0.349                 |

368 <sup>(1)</sup> not meaningful in this context; <sup>(2)</sup> equal values because they refer to different terms of the same variable

369

370

371

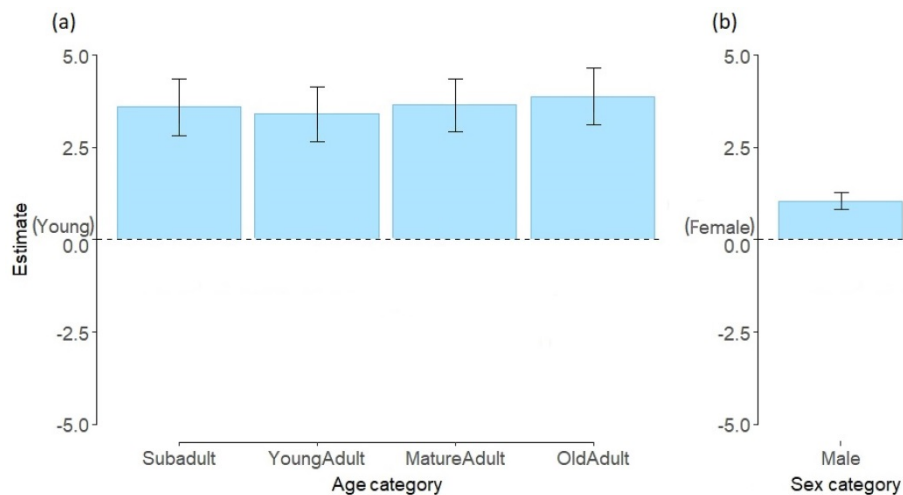

372

373

374

375

376

377

**Figure 1.** Estimates of the predictors age and sex on the likelihood of attempting an initiation of group departure, from GLMM (reference category being “young” and “female”). (a) All adult categories are significantly more likely to attempt than young individuals. (b) Males are significantly more likely to attempt than females.

378

379

380

381

382

383

384

385

386

387

388

389

390

391

Because only three group departures were initiated by young subjects, we excluded these from further analyses to avoid convergence issues. Out of the 52 initiation attempts by adult females, 42 (80.8%) were successful, while out of the 91 attempts by adult males, 79 (86.8%) were successful. Once failed, an individual that attempted to initiate tried again only twice in 23 occurrences of unsuccessful attempts. Adult age category, sex, and/or individual association did not explain the variation in success of initiation (likelihood ratio test:  $\chi^2 = 3.309$ ,  $df = 5$ ,  $P = 0.653$ ).

We next tested whether initiators and followers differed in signal usage during group departures. Initiators signaled in 57.7% of observations, while followers used signals only in 19.5 % of observations (Figure 2a; mean signaling rates across  $N = 86$  individuals;  $N = 1102$  events;  $P < 0.001$ ; Table S1). Whether or not initiators used signals had no effect on their success rates. When a signal was used, the success rate was 83.6%; when no signal was used, it was 86.4 % (Figure 2b;  $N = 142$  events;  $P = 0.947$ , see ESM for details Table S2). Note that signaling rates were first averaged for each individual and then across all individuals.

391

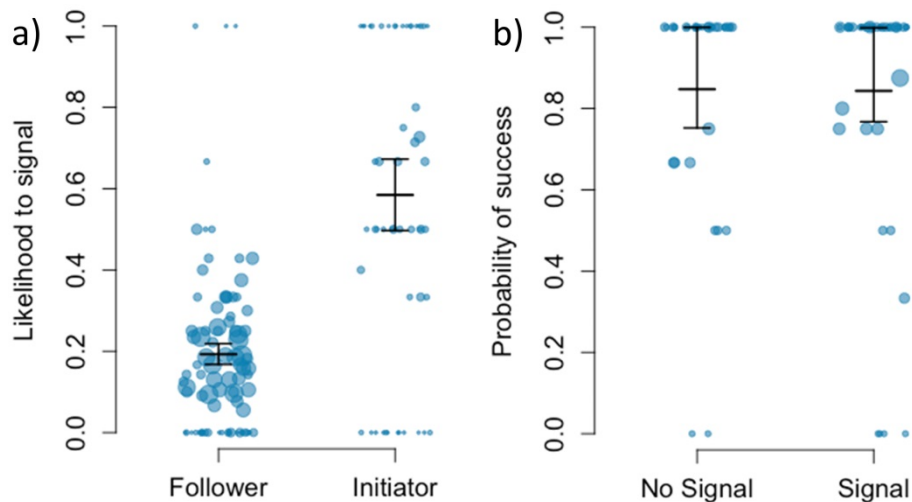

392  
393 **Figure 2.** (a) Likelihood of followers and initiators to signal during group departures. (b) Probability of  
394 success in relation to signaling during initiation.  
395

396 When leaving the pre-departure area, the time intervals between two individuals that  
397 belonged to the same unit was significantly shorter (mean = 13.7 s; range: 0-260 s) than the interval  
398 time between two individuals who did not belong to the same unit (mean = 25.6 s; range: 0-910 s);  
399 Table S3; likelihood ratio test:  $\chi^2 = 23.9$ ,  $df = 1$ ,  $P < 0.001$ ,  $N = 813$  intervals in 40 events).

400

### 401 3.2 Group progressions

402 We collected data on 100 events of group progression. Seventeen events involved more than one  
403 party. During the collected events, members of party 4 and 10 were always travelling with at least  
404 one of the other three parties. The number of events in which parties 4 and 10 were involved was  
405 very low ( $\leq 7$  per party) compared to those in which party 5, 6 and 9 were involved ( $\geq 27$  per party).  
406 Therefore, we excluded the individuals belonging to party 4 and 10 from the analyses, to achieve  
407 comparable numbers of events per party. Eleven events involved portions of a party because the  
408 party split for some hours or the whole day. In 6 of these events, the progressing group consisted of  
409 only 2 units.

410 Overall, the model outcomes revealed that age explained parts of the positioning of individuals  
411 during group progressions (i.e. 95% posterior density intervals do not include 0; Table 4). Adults were  
412 located more in front positions than middle or rear. It was also more likely to find adults in rear  
413 positions than in the middle of the group. Young individuals were somewhat less likely to take front  
414 positions compared to the other two categories (Figure 3a; the distribution of relative frequencies in  
415 Table S4).

416

417

418 **Table 4.** Effect of age (adult; young) on the likelihood for an individual to take a front, middle or rear  
 419 position during a group progression. Reference category front and adult. Posterior means,  
 420 confidence intervals, sample size and P-values derived from MCMC procedure.

421

|                  | Posterior mean | CI <sub>lower</sub> | CI <sub>upper</sub> | effective sample size | P MCMC |
|------------------|----------------|---------------------|---------------------|-----------------------|--------|
| middle and adult | -0.338         | -0.526              | -0.141              | 538.0                 | <0.001 |
| rear and adult   | -0.247         | -0.436              | -0.054              | 574.7                 | 0.001  |
| middle and young | 0.542          | 0.177               | 0.886               | 648.9                 | 0.004  |
| rear and young   | 0.430          | 0.085               | 0.759               | 801.0                 | 0.016  |

422

423 We then considered only adult individuals for testing the effect of being a female, a primary  
 424 male or a non-primary male on the position during group progressions. Sex and the distinction  
 425 between primary and non-primary males explained variability in the order of group progression  
 426 (Table 5). Adult females were found in all thirds with similar likelihood. Primary males mainly took  
 427 front positions during group progressions, and were least frequently observed in middle positions.  
 428 The strongest effects were observed for non-primary males, who were more likely to move in the  
 429 front third than in the middle or rear third; their pattern differed significantly from that of females  
 430 (distributions did not overlap; Figure 3b; the distribution of relative frequencies in Table S5)

431

432 **Table 5.** Effect of being a female, a primary male or a non-primary male on the likelihood for an  
 433 individual to take front, middle or rear positions during a group progression. Reference category  
 434 front third and female. Posterior means, confidence intervals, sample size and P-values derived from  
 435 MCMC procedure.

436

|                             | Posterior mean | CI <sub>lower</sub> | CI <sub>upper</sub> | effective sample size | P MCMC |
|-----------------------------|----------------|---------------------|---------------------|-----------------------|--------|
| middle and female           | 0.057          | -0.212              | 0.303               | 602.1                 | 0.679  |
| rear and female             | 0.050          | -0.214              | 0.313               | 600.4                 | 0.710  |
| middle and primary male     | -0.439         | -0.912              | 0.060               | 593.8                 | 0.086  |
| rear and primary male       | -0.276         | -0.755              | 0.189               | 541.3                 | 0.262  |
| middle and non-primary male | -1.240         | -1.758              | -0.817              | 535.1                 | <0.001 |
| rear and non-primary male   | -0.968         | -1.430              | -0.563              | 542.2                 | <0.001 |

437

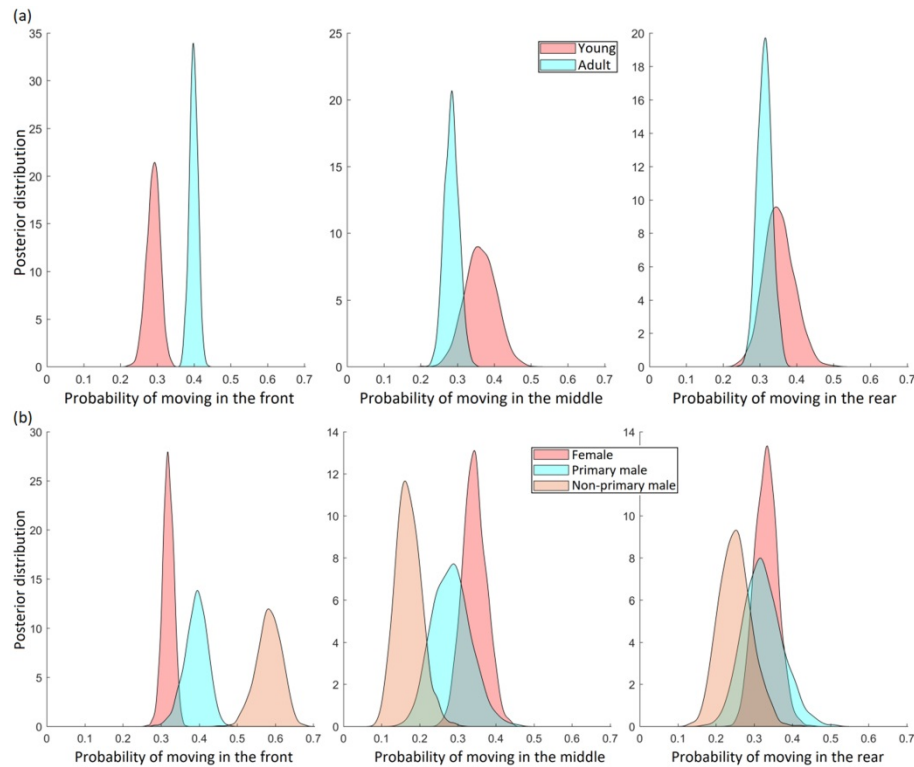

438  
 439 **Figure 3.** Posterior probability distributions to progress in front, middle or rear positions according to  
 440 (a) age and (b) sex (adult subjects only). The distribution of relative frequency per category per third,  
 441 i.e. estimated probabilities, in ESM.  
 442

443 Furthermore, non-primary males were observed significantly more often in the front half of  
 444 the first third, as compared to females and primary males, which tended to progress in the half closer  
 445 to the middle of the group ( $P < 0.001$ , Table S6). Non-primary males were also observed significantly  
 446 more often in the back half of the rear third, as compared to females and primary males, which again  
 447 progressed in the half closer to the middle of the group ( $P < 0.001$ , Table S7).

448 During group progressions subjects who belonged to the same unit were more likely to travel  
 449 together, as evidenced by the interval time between two individuals belonging to the same unit  
 450 (mean = 4.2 s; range: 1-70 s), which was significantly shorter than the interval time between two  
 451 individuals that did not belong to the same unit (mean = 8.9 s; range: 1-293 s; likelihood ratio test:  $\chi^2$   
 452 = 201.5,  $df = 1$ ,  $P < 0.001$ ,  $N = 2226$  intervals involving  $N = 120$  individuals following in 100 events,  
 453 Table S8).

454

#### 455 **4 Discussion**

456 In our study population of Guinea baboons, collective movements were predominantly initiated by  
 457 adult individuals. Adult males attempted initiations more often (62% of events) than adult females  
 458 (36%, juveniles 2%). The vast majority of initiation attempts were successful (males 87%; females  
 459 80%). In other baboon species (olive, yellow and chacma), adult males were also reported as the  
 460 major, but not exclusive, actors during group departures (King et al., 2011; Norton, 1986; Ransom,



461 1981; Stueckle & Zinner, 2008). The patterns we observed in Guinea baboon group departures and  
462 progressions were overall more similar to the patterns observed in uni-level species, such as chacma  
463 and olive baboons (Strandburg-Peshkin et al., 2015; Stueckle & Zinner, 2008), than to the patterns  
464 observed for hamadryas baboons.

465 In hamadryas baboons, only adult males were observed to take part in the negotiation and  
466 decision making on the direction and timing of coordinated departures of several OMUs (clans) from  
467 the sleeping sites (Kummer, 1968a, 1995; Stolba, 1979). In Guinea baboons, in contrast, adult  
468 females initiated group departures in about a third of the cases. Their greater share in initiating  
469 departures compared to other hamadryas baboons may be a result of the higher degree of ‘female  
470 freedom’. More specifically, female Guinea baboons are not coerced to maintain constant close  
471 proximity to their males and they have greater leverage in association patterns (Goffe et al., 2016).  
472 Also, the complex “negotiating” behaviors described for hamadryas baboons were observed  
473 extremely rarely. Instead, any adult Guinea baboon who moved off could trigger a group departure.

474 The observed differences between Guinea and hamadryas baboons likely reflect true species  
475 differences, but they may also be due to differences in data collection procedures. Descriptions of  
476 the hamadryas group departures by Kummer (1968a) and Stolba (1979) encompassed only  
477 departures from the sleeping site in a relatively open landscape, whereas our observations  
478 encompassed a mixture of observations in the early morning hours up to midday. We did not find  
479 any differences in departure processes among early morning departures and departures later during  
480 the day.

481 Although Byrne (1981) had observed negotiation processes similar to those described for  
482 hamadryas baboons during morning departures of Guinea baboons, we recorded such behaviors only  
483 in two cases. Males of two OMUs showed greeting interactions (Dal Pesco & Fischer 2018) before  
484 both left the sleeping site in the same direction with their party members. We are therefore rather  
485 confident that elaborate negotiation processes do not play a major role in group coordination in this  
486 species.

487 Another reason for the differences between Guinea and hamadryas in pre-departure  
488 coordination processes may be different ecological conditions of the two species (e.g. Chala, Roos,  
489 Svenning & Zinner, 2019). Kummer (1968a) and Stolba (1979) speculated that the elaborate  
490 coordination process of hamadryas baboons is an adaptation to their arid environment. To exploit  
491 food resources hamadryas bands often need to fission. Bands may break up into clans and even  
492 single OMUs during foraging, but have to fuse again at scarce water sources or sleeping sites. Since  
493 habitats of Guinea baboons in most parts of their distribution range are more productive than the  
494 average hamadryas baboon habitat, i.e. higher densities of food and water resources, an elaborate  
495 decision process on the direction of the daily travel direction might not be necessary.

496           Although signalers were more likely to use signals during departures, which could be taken as  
497 an expression of their intention to move (or perhaps their intention to initiate a group movement;  
498 Fischer & Zinner, 2011), this had no significant effect on their success in initiating group movement.  
499 However, the power to detect an effect of signaling was low, as initiators were generally highly  
500 successful in initiating group movement. It might also be the case that initiators who signaled were  
501 indeed more highly motivated than those who did not signal, while followers were not affected by  
502 the initiator's expression of motivation (Fischer & Price 2017).

503           The spatial positioning of progressing baboons has been primarily seen as an adaptation to  
504 terrestrial lifestyle with its respective predation pressure (DeVore & Washburn, 1963). Progressions  
505 of olive baboons were led by low-ranking adult males and older immature males. The most dominant  
506 adult males, females with infants, and the youngest juveniles were in the center of the troop. The  
507 rear portion of the troop was a mirror image of the front, with low-ranking adult males and older  
508 immature males (DeVore & Washburn, 1963). In other populations of olive, yellow and chacma  
509 baboons, however, adult males predominantly occupied front positions, while young individuals  
510 mainly occupied central positions and adult females were equally spread from the front to the rear  
511 (Harding 1977; Rhine et al., 1985; Rhine & Tilson, 1987). The progression of Guinea baboons  
512 resembled the pattern described by DeVore & Washburn (1963), with non-primary adult males at the  
513 front and primary males in more central positions. Adult females, however, occupied front, center or  
514 rear position with similar probabilities, similar to what Rhine (1975) and Rhine & Tilson 1987)  
515 reported from yellow and chacma baboons. Positions at the rear of the group were equally taken by  
516 individuals of all age/sex classes. In summary, no clear pattern emerged for the different baboon  
517 species. The analysis of the interval times indicated that individuals belonging to the same units, i.e.  
518 individuals with closer social bonds, were more likely to depart and travel in close proximity,  
519 corroborating previous findings in other baboon species (Bonnell, Clarke, Henzi & Barrett, 2017;  
520 Farine et al., 2017; King et al., 2008, 2011; Kummer 1968a).

521           A comparison of the available data for the different species suggests that neither social  
522 organization nor ecological conditions fully account for differences in group coordination processes.  
523 With regard to the social organization, we found substantial differences between hamadryas and  
524 Guinea baboons; thus life in a multi-level society does not necessarily give rise to elaborate  
525 negotiation processes. The alternative idea that the harsh semi-desert conditions promotes  
526 negotiation behaviors and accounts for the observed variation neither seems to be true, as chacma  
527 baboons living in the Namib desert do not conform to the hamadryas pattern either (King et al.,  
528 2008, 2011). A possible explanation may be that it takes both factors together: a multi-level society  
529 with rather shallow rank hierarchies between males, and a resource distribution promoting fission-  
530 fusion dynamics. One way to test this conjecture would be to observe Guinea baboons living in harsh

531 environments, such as the Sahara desert in Mauritania. Such observations are presently beyond our  
532 means, but could provide the answer to the question which combination of drivers accounts for the  
533 regulation of group coordination processes in baboons.

534

#### 535 ACKNOWLEDGMENTS

536 We would like to thank the Direction des Parcs Nationaux (DNP) and the Ministère de  
537 l'Environnement et de la Protection de la Nature (MEPN) du Sénégal for approval to conduct this  
538 study in the Parc National du Niokolo Koba (PNNK). The support of Col. Mallé Guye is particularly  
539 appreciated. We are grateful to the CPR team: Sonia Domínguez Alba, Muriel Drouglazet, Lauriane  
540 Faraut, Josefine Kalbitz, Harry Siviter, Franziska Wegdell for their help with the data collection and  
541 Roger Mundry for helpful discussion and statistical advice. This research was funded by the Deutsche  
542 Forschungsgemeinschaft (DFG, German Research Foundation) – Project number 254142454/GRK  
543 2070, as part of the Research Training Group “Understanding Social Relationships”. JH was funded by  
544 the DFG RTG 1644 “Scaling problems in Statistics”. Support by the Leibniz ScienceCampus “Primate  
545 Cognition” is gratefully acknowledged.

546

#### 547 DATA AVAILABILITY STATEMENT

548 Data and code are available upon request.

549

#### 550 COMPETING INTERESTS

551 The authors declare no competing interests.

552

#### 553 ORCID

554 Julia Fischer <https://orcid.org/0000-0002-5807-0074>

555 Dietmar Zinner <http://orcid.org/0000-0003-3967-8014>

556

#### 557 **References**

558 Altmann, J. (1974). Observational study of behavior: Sampling methods. *Behaviour*, 49, 227-267. DOI:  
559 10.1163/156853974X00534

560 Altmann, S. A. (1979). Baboon progressions: Order or chaos? A study of one-dimensional geometry.  
561 *Animal Behaviour*, 27, 46-80. DOI: 10.1016/0003-3472(79)90128-3

562 Anandam, M. V., Bennett, E. L., Davenport, T. R. B., Davies, N. J., Detwiler, K. M., Engelhardt, A.,  
563 Eudey, A. A., ... Zinner, D. (2013). Species accounts of Cercopithecidae. In R. A. Mittermeier, A. B.  
564 Rylands & D. E. Wilson (Eds.), *Handbook of the Mammals of the World Vol 3 Primates*. (pp. 628-  
565 753). Barcelona: Lynx Edicions.

- 566 Baayen, R. H. (2008). *Analyzing Linguistic Data. A Practical Introduction to Statistics*. Cambridge:  
567 Cambridge University Press.
- 568 Ballerini, M., Cabibbo, N., Candelier, R., Cavagna, A., Cisbani, E., Giardina, I., Orlandi, A., ... Zdravkovic  
569 V. (2008). Empirical investigation of starling flocks: a benchmark study in collective animal  
570 behaviour. *Animal Behaviour*, 76, 201-215. DOI: 10.1016/j.anbehav.2008.02.004
- 571 Barr, D. J., Levy, R., Scheepers, C., & Tily, H. J. (2013). Random effects structure for confirmatory  
572 hypothesis testing: Keep it maximal. *Journal of Memory and Language*, 68, 255-278. DOI:  
573 10.1016/j.jml.2012.11.001
- 574 Barrett, L., & Henzi, S. P. (2008). Baboons. *Current Biology*, 18, R404-R406. DOI:  
575 10.1016/j.cub.2008.02.074
- 576 Bates, D., Mächler, M., Bolker B., & Walker, S. (2015). Fitting Linear Mixed-Effects Models using lme4.  
577 *Journal of Statistical Software*, 67, 1-48. DOI: 10.18637/jss.v067.i01
- 578 Bazazi, S., Buhl, J., Hale, J. J., Anstey, M. L., Sword, G. A., Simpson, S. J., & Couzin, I. D. (2008).  
579 Collective motion and cannibalism in locust migratory bands. *Current Biology*, 18, 735–739. DOI:  
580 10.1016/j.cub.2008.04.035
- 581 Black, J. M. (1988). Preflight signalling in swans: a mechanism for group cohesion and flock  
582 formation. *Ethology*, 79, 143–157. DOI: 10.1111/j.1439-0310.1988.tb00707.x
- 583 Bolker, B. M., Brooks, M. E., Clark, C. J., Geange, S. W., Poulsen, J. R., Stevens, M. H., & White, J-S. S.  
584 (2009). Generalized linear mixed models: a practical guide for ecology and evolution. *Trends in*  
585 *Ecology & Evolution*, 24, 127-135. DOI: 10.1016/j.tree.2008.10.008
- 586 Bonnell, T. R., Clarke, P. M., Henzi, S. P., & Barrett, L. (2017). Individual-level movement bias leads to  
587 the formation of higher-order social structure in a mobile group of baboons. *Royal Society Open*  
588 *Science*, 4, 170148. DOI: 10.1098/rsos.170148
- 589 Bonnell, T. R., Henzi, S. P., & Barrett, L. (2019). Functional social structure in baboons: Modeling  
590 interactions between social and environmental structure in group-level foraging. *Journal of*  
591 *Human Evolution*, 126, 14-23. DOI: 10.1016/j.jhevol.2018.10.011
- 592 Bousquet, C. A. H., Sumpter, D. J. T., & Manser, M. B. (2011). Moving calls: a vocal mechanism  
593 underlying quorum decisions in cohesive groups. *Proceedings of the Royal Society B: Biological*  
594 *Sciences*, 278, 1482-1488. DOI: 10.1098/rspb.2010.1739
- 595 Buskirk, W.H., Buskirk, R.E., & Hamilton, W.J. (1974). Troop-mobilizing behavior of adult male chacma  
596 baboons. *Folia Primatologica*, 22, 9-18. DOI: 10.1159/000155615
- 597 Briard, L., Dorn, C., & Petit, O. (2015). Personality and affinities play a key role in the organisation of  
598 collective movements in a group of domestic horses. *Ethology*, 121, 888–902. DOI:  
599 10.1111/eth.12402

- 600 Byrne, R. W. (1981). Distance vocalisations of Guinea baboons (*Papio papio*) in Senegal: An analysis  
601 of function. *Behaviour*, 78, 283-312.
- 602 Byrne, R. W., Whiten, A., & Henzi, S. P. (1990). Social relationships of mountain baboons: Leadership  
603 and affiliation in a non-female-bonded monkey. *American Journal of Primatology*, 20, 313-329.  
604 DOI: 10.1002/ajp.1350200409
- 605 Chala, D., Roos, C., Svenning, J. C., & Zinner, D. (2019). Species-specific effects of climate change on  
606 the distribution of suitable baboon habitats – Ecological niche modeling of current and Last  
607 Glacial Maximum conditions. *Journal of Human Evolution*, 132, 215-226. DOI:  
608 10.1016/j.jhevol.2019.05.003
- 609 Conradt, L., & Roper, T. J. (2003). Group decision-making in animals. *Nature*, 421, 155-158. DOI:  
610 10.1038/nature01294
- 611 Conradt, L., & Roper, T. J. (2005). Consensus decision making in animals. *Trends in Ecology &*  
612 *Evolution*, 20, 449-456. DOI: 10.1016/j.tree.2005.05.008
- 613 Couzin, I. D., & Krause, J. (2003). Self-organization and collective behavior in vertebrates. *Advances in*  
614 *the Study of Behavior*, 32, 1-75. DOI: 10.1016/S0065-3454(03)01001-5
- 615 Couzin, I. D., Krause, J., Franks, N. R., & Levin, S. A. (2005). Effective leadership and decision-making  
616 in animal groups on the move. *Nature*, 433, 513-516. DOI: 10.1038/nature03236
- 617 Couzin, I. D., Ioannou, C. C., Demirel, G., Gross, T., Torney, C. J., Hartnett, A., Conradt, L., ... Leonard,  
618 N. E. (2011). Uninformed individuals promote democratic consensus in animal groups. *Science*,  
619 334, 1578–1580. DOI: 10.1126/science.1210280
- 620 Dal Pesco, F., & Fischer, J. (2018). Greetings in male Guinea baboons and the function of rituals in  
621 complex social groups. *Journal of Human Evolution*, 125, 87-98. DOI:  
622 10.1016/j.jhevol.2018.10.007
- 623 del Mar Delgado, M., Miranda, M., Alvarez, S. J., Gurarie, E., Fagan, W. F., Penteriani, V., ... Morales, J.  
624 M. (2018). The importance of individual variation in the dynamics of animal collective  
625 movements. *Philosophical Transactions of the Royal Society B: Biological Sciences*, 373,  
626 20170008. DOI: 10.1098/rstb.2017.0008
- 627 Deneubourg, J., & Goss, S. (1989). Collective patterns and decision making. *Ethology Ecology &*  
628 *Evolution*, 1, 295-311. DOI: 10.1080/08927014.1989.9525500
- 629 DeVore, I., & Washburn, S. L. (1963). Baboon ecology and human evolution. In F. C. Howell, & F.  
630 Bourlière (Eds.), *African Ecology and Human Evolution* (pp. 335-367). Chicago: Aldine.
- 631 Dobson, A. J. (2002). *An Introduction to Generalized Linear Models*. Boca Raton, FL: Chapman and  
632 Hall/CRC.
- 633 Fahrmeir, L., Kneib, Z., Lang, S., & Marx, B. (2013). *Regression. Models, Methods and Applications*.  
634 Heidelberg: Springer,

- 635 Farine, D. R., Strandburg-Peshkin, A., Berger-Wolf, T., Ziebart, B., Brugere, I., Li, J., & Crofoot, M. C.  
636 (2016). Both nearest neighbours and long-term affiliates predict individual locations during  
637 collective movement in wild baboons. *Scientific Reports*, 6, 27704. DOI: 10.1038/srep27704
- 638 Farine, D. R., Strandburg-Peshkin, A., Couzin, I. D., Berger-Wolf, T. Y., & Crofoot, M. C. (2017).  
639 Individual variation in local interaction rules can explain emergent patterns of spatial  
640 organization in wild baboons. *Proceedings of the Royal Society B: Biological Sciences*, 284. DOI:  
641 10.1098/rspb.2016.2243
- 642 Fischer, J., & Price, T. (2017). Meaning, intention, and inference in primate vocal communication.  
643 *Neuroscience & Biobehavioral Reviews*, 82, 22-31. DOI: 10.1016/j.neubiorev.2016.10.014
- 644 Fischer, J., Kopp, G. H., Dal Pesco, F., Goffe, A., Hammerschmidt, K., Kalbitzer, U., Klapproth, M., ...  
645 Zinner D. (2017). Charting the neglected West: The social system of Guinea baboons. *American*  
646 *Journal of Physical Anthropology*, 162(S63), 15-31. DOI: 10.1002/ajpa.23144
- 647 Fischer, J., & Zinner, D. (2011). Communication and cognition in primate group movement.  
648 *International Journal of Primatology*, 32, 1279-1295. DOI: 10.1007/s10764-011-9542-7
- 649 Fischhoff, I. R., Sundaresan, S. R., Cordingley, J., Larkin, H. M., Sellier, M. J., & Rubenstein, D. I. (2007).  
650 Social relationships and reproductive state influence leadership roles in movements of plains  
651 zebra, *Equus burchellii*. *Animal Behaviour*, 73, 825-831. DOI: 10.1016/j.anbehav.2006.10.012
- 652 Forstmeier, W., & Schielzeth, H. (2011). Cryptic multiple hypotheses testing in linear models:  
653 overestimated effect sizes and the winner's curse. *Behavioral Ecology and Sociobiology*, 65, 47-  
654 55. DOI: 10.1007/s00265-010-1038-5
- 655 Goffe, A. S., Zinner, D., & Fischer, J. (2016). Sex and friendship in a multilevel society: behavioural  
656 patterns and associations between female and male Guinea baboons. *Behavioral Ecology and*  
657 *Sociobiology*, 70, 323-336. DOI: 10.1007/s00265-015-2050-6
- 658 Grueter, C. C., & Zinner, D. (2004). Nested societies. Convergent adaptations of baboons and snub-  
659 nosed monkeys? *Primate Report*, 70, 1-98.
- 660 Hadfield, J. D. (2010). MCMC methods for multi-response Generalized Linear Mixed Models: the  
661 MCMCglmm R Package. *Journal of Statistical Software*, 33, 1–22. DOI:10.18637/jss.v033.i02
- 662 Harding, R. S. O. (1977). Patterns of movement in open country baboons. *American Journal of*  
663 *Physical Anthropology*, 47, 349-354. DOI: 10.1002/ajpa.1330470215
- 664 Hartig, F. (2017). *DHARMA: residual diagnostics for hierarchical (multi-level/mixed) regression*  
665 *models. R package*. <http://florianhartig.github.io/DHARMA>
- 666 Jolles, J. W., Boogert, N. J., Sridhar, V. H., Couzin, I. D., & Manica, A. (2017). Consistent individual  
667 differences drive collective behavior and group functioning of schooling fish. *Current Biology*, 27,  
668 2862–2868.e7. DOI: 10.1016/j.cub.2017.08.004

- 669 King, A. J., Douglas, C. M. S., Huchard, E., Isaac, N. J. B., Cowlshaw, G. (2008). Dominance and  
670 affiliation mediate despotism in a social primate. *Current Biology*, 18, 1-6. DOI:  
671 10.1016/j.cub.2008.10.048
- 672 King, A. J., & Cowlshaw, G. (2009). Leaders, followers and group decision-making. *Communicative &*  
673 *Integrative Biology*, 2, 1-4.
- 674 King, A. J., Fehlmann, G., Biro, D., Ward, A. J., & Fürtbauer, I. (2018). Re-wilding collective behaviour:  
675 an ecological perspective. *Trends in Ecology & Evolution*, 33, 347-357. DOI:  
676 10.1016/j.tree.2018.03.004
- 677 King, A. J., Sueur, C., Huchard, E., & Cowlshaw, G. (2011). A rule-of-thumb based on social affiliation  
678 explains collective movements in desert baboons. *Animal Behaviour*, 82, 1337-1345. DOI:  
679 10.1016/j.anbehav.2011.09.017
- 680 Krause, J., & Ruxton, G. D. (2002). *Living in Groups*. Oxford, UK: Oxford University Press.
- 681 Kummer, H. (1968a). *Social Organization of Hamadryas Baboons. A Field Study*. Chicago: The  
682 University of Chicago Press.
- 683 Kummer, H. (1968b). Two variations in the social organization of baboons. In P. C. Jay (Ed.), *Primates:*  
684 *Studies in Adaptation and Variability* (pp. 293-312). New York: Holt, Rinehart & Winston.
- 685 Kummer, H. (1995). *In Quest of the Sacred Baboon*. Princeton: Princeton University Press.
- 686 Leca, J. B., Gunst, N., Thierry, B., & Petit, O. (2003). Distributed leadership in semifree-ranging white-  
687 faced capuchin monkeys. *Animal Behaviour*, 66, 1045-1052. DOI: 10.1006/anbe.2003.2276
- 688 Lorenz, K. (1931). Beiträge zur Ethologie sozialer Corviden. *Journal für Ornithologie*, 79, 67-127. DOI:  
689 10.1007/BF01950950
- 690 Lusseau, D., & Conradt, L. (2009). The emergence of unshared consensus decisions in bottlenose  
691 dolphins. *Behavioral Ecology and Sociobiology*, 63, 1067–1077. DOI: 10.1007/s00265-009-0740-  
692 7
- 693 Maciej, P. (2013). *Vocal Communication in a Tolerant, Multi-level Society: Insights from Signallers and*  
694 *Receivers in Guinea Baboons*. PhD thesis, Georg-August-Universität, Göttingen, Germany.
- 695 MATLAB and Statistics Toolbox Release 2018a (2018) The MathWorks, Inc., Natick, Massachusetts,  
696 U.S.A. <http://www.mathworks.com/>
- 697 Mehlman, P. T. (1996). Branch shaking and related displays in wild Barbary macaques. In J. E. Fa, & D.  
698 G. Lindburg (Eds.), *Evolution and Ecology of Macaque Societies* (pp. 503–526). Cambridge, UK:  
699 Cambridge University Press.
- 700 Nagy, M., Ákos, Z., Biro, D., & Vicsek, T. (2010). Hierarchical group dynamics in pigeon flocks. *Nature*,  
701 464, 890–893. DOI: 10.1038/nature08891

- 702 Norton, G. W. (1986). Leadership: decision processes of group movement in yellow baboons. In J. G.  
703 Else, & P. C. Lee (Eds.), *Primate Ecology and Conservation* (pp. 145-156). Cambridge, UK:  
704 Cambridge University Press.
- 705 Ozogány, K., & Vicsek, T. (2015). Modeling the emergence of modular leadership hierarchy during the  
706 collective motion of herds made of harems. *Journal of Statistical Physics*, 158, 628–646. DOI:  
707 10.1007/s10955-014-1131-7
- 708 Patzelt, A., Kopp, G. H., Ndao, I., Kalbitzer, U., Zinner, D., & Fischer, J. (2014). Male tolerance and  
709 male–male bonds in a multilevel primate society. *Proceedings of the National Academy of*  
710 *Sciences*, 111, 14740–14745. DOI: 10.1073/pnas.1405811111
- 711 Petit, O., & Bon, R. (2010). Decision-making processes: The case of collective movements.  
712 *Behavioural Processes*, 84, 635–647. DOI: 10.1016/j.beproc.2010.04.009
- 713 Pines, M., & Swedell, L. (2011). Not without a fair fight: failed abductions of females in wild  
714 hamadryas baboons. *Primates*, 52, 249-252. DOI: 10.1007/s10329-011-0242-x
- 715 Pyritz, L. W., King, A. J., Sueur, C., & Fichtel, C. (2011a). Reaching a consensus: terminology and  
716 concepts used in coordination and decision-making research. *International Journal of*  
717 *Primatology*, 32, 1268-1278. DOI: 10.1007/s10764-011-9524-9
- 718 Pyritz, L. W., Kappeler, P. M., & Fichtel, C. (2011b). Coordination of group movements in wild red-  
719 fronted lemurs (*Eulemur rufifrons*): processes and influence of ecological and reproductive  
720 seasonality. *International Journal of Primatology*, 32, 1325-1347. DOI: 10.1007/s10764-011-  
721 9549-0
- 722 Ransom, T. W. (1981). *Beach Troop of the Gombe*. Lewisburg, PA: Bucknell University Press.
- 723 Ramos, A., Manizan, L., Rodriguez, E., Kemp, Y. J. M., & Sueur, C. (2018). How can leadership  
724 processes in European bison be used to improve the management of free-roaming herds.  
725 *European Journal of Wildlife Research*, 64. DOI: 10.1007/s10344-018-1175-0
- 726 R Core Team (2018). *R: A language and environment for statistical computing*. R Foundation for  
727 Statistical Computing, Vienna, Austria. <https://www.R-project.org/>
- 728 Rhine, R. J. (1975). The order of movement of yellow baboons (*Papio cynocephalus*). *Folia*  
729 *Primatologica*, 23, 72–104. DOI: 10.1159/000155662
- 730 Rhine, R. J., & Westlund, B. J. (1981). Adult male positioning in baboon progressions: Order or chaos  
731 revisited. *Folia Primatologica*, 35, 77-116. DOI: 10.1159/000155968
- 732 Rhine, R. J., Forthman, D. L., Stillwell-Barnes, R., Westlund, B. J., & Westlund, H. D. (1981). Movement  
733 patterns of yellow baboons (*Papio cynocephalus*): Sex differences in juvenile development  
734 toward adult patterns. *American Journal of Physical Anthropology*, 55, 473–484. DOI:  
735 10.1002/ajpa.1330550408



- 736 Rhine, R. J., Bioland, P., & Lodwick, L. (1985). Progressions of adult male chacma baboons (*Papio*  
737 *ursinus*) in the Moremi Wildlife Reserve. *International Journal of Primatology*, 6, 115–122. DOI:  
738 10.1007/BF02693649
- 739 Rhine, R. J., & Tilson, R. (1987). Reactions to fear as a proximate factor in the sociospatial  
740 organization of baboon progressions. *American Journal of Primatology*, 13, 119–128. DOI:  
741 10.1002/ajp.1350130203
- 742 Rowell, T. E. (1969). Long-term changes in a population of Ugandan baboons. *Folia Primatologica*, 11,  
743 241-254. DOI: 10.1159/000155273
- 744 RStudio Team (2016). *RStudio: Integrated Development for R*. RStudio, Inc., Boston, MA  
745 <http://www.rstudio.com/>
- 746 Schreier, A. L., & Swedell, L. (2009). The fourth level of social structure in a multi-level society:  
747 ecological and social functions of clans in hamadryas baboons. *American Journal of Primatology*,  
748 71, 948-955. DOI: 10.1002/ajp.20736
- 749 Seltmann, A., Majolo, B., Schülke, O., & Ostner, J. (2013). The organization of collective group  
750 movements in wild Barbary macaques (*Macaca sylvanus*): Social structure drives processes of  
751 group coordination in macaques. *PLoS ONE*, 8, e67285. DOI: 10.1371/journal.pone.0067285
- 752 Schamberg, I., Cheney, D. L., & Seyfarth, R. M. (2017). Bonobos (*Pan paniscus*) perform branch drag  
753 displays before long-distance travel. *International Journal of Primatology*, 38, 500–512. DOI:  
754 10.1007/s10764-017-9957-x
- 755 Sperber, A. L. (2018). *Group Coordination Processes and Determinants of Leadership in Red-fronted*  
756 *Lemurs* (*Eulemur rufifrons*). PhD thesis, Georg-August Universität, Göttingen, Germany.
- 757 Stolba, A. (1979). *Entscheidungsfindung in Verbänden von Papio hamadryas*. PhD thesis, Universität  
758 Zürich, Zürich, Switzerland.
- 759 Stoltz, L., & Saayman, G. (1970). Ecology and behaviour of baboons in the Northern Transvaal. *Annals*  
760 *of the Transvaal Museum*, 26, 99-143.
- 761 Strandburg-Peshkin, A., Farine, D. R., Couzin, I. D., & Crofoot, M. C. (2015). Shared decision-making  
762 drives collective movement in wild baboons. *Science*, 348, 1358-1361. DOI:  
763 10.1126/science.aaa5099
- 764 Strandburg-Peshkin, A., Farine, D. R., Crofoot, M. C., & Couzin, I. D. (2017). Habitat and social factors  
765 shape individual decisions and emergent group structure during baboon collective movement.  
766 *eLife*, 6, e19505. DOI: 10.7554/eLife.19505
- 767 Strandburg-Peshkin, A., Papageorgiou, D., Crofoot, M. C., & Farine, D. R. (2018). Inferring influence  
768 and leadership in moving animal groups. *Philosophical Transactions of the Royal Society B*, 373,  
769 1–22. DOI: 10.1098/rstb.2017.0006

- 770 Stueckle, S., & Zinner, D. (2008). To follow or not to follow: decision making and leadership during  
771 the morning departure in chacma baboons. *Animal Behaviour*, 75, 1995-2004. DOI:  
772 10.1016/j.anbehav.2007.12.012
- 773 Sueur, C., & Petit, O. (2008a). Shared or unshared consensus decision in macaques? *Behavioural*  
774 *Processes*, 78, 84-92. DOI: 10.1016/j.beproc.2008.01.004
- 775 Sueur, C., & Petit, O. (2008b). Organization of group members at departure is driven by social  
776 structure in *Macaca*. *International Journal of Primatology*, 29, 1085-1098. DOI: 10.1007/s10764-  
777 008-9262-9
- 778 Sueur, C., King, A. J., Conradt, L., Kerth, G., Lusseau, D., Mettke-Hofmann, C., Schaffner, C. M.,  
779 Williams, L., Zinner, D., & Aureli, F. (2011). Collective decision-making and fission–fusion  
780 dynamics: a conceptual framework. *Oikos*, 120, 1608-1617. DOI: 10.1111/j.1600-  
781 0706.2011.19685.x
- 782 Sueur, C., & Deneubourg, J. L. (2011). Self-organization in primates: understanding the rules  
783 underlying collective movements. *International Journal of Primatology*, 32, 1413–1432. DOI:  
784 10.1007/s10764-011-9520-0
- 785 Swedell, L. (2011). African Papionins: Diversity of social organization and ecological flexibility. In C. J.  
786 Campbell, A. Fuentes, K. C. MacKinnon, S. K. Bearder, & R. M. Stumpf (Eds.), *Primates in*  
787 *Perspective* (pp. 241-277). New York: Oxford University Press.
- 788 Tokuyama, N, & Furuichi, T. (2017). Leadership of old females in collective departures in wild  
789 bonobos (*Pan paniscus*) at Wamba. *Behavioral Ecology and Sociobiology*, 71, 55. DOI:  
790 10.1007/s00265-017-2277-5
- 791 Toulet, S., Gautrais, J., Bon, R., & Peruani, F. (2015). Imitation combined with a characteristic stimulus  
792 duration results in robust collective decision-making. *PloS ONE*, 10, e0140188. DOI:  
793 10.1371/journal.pone.0140188
- 794 Walker, R. H., King, A. J., McNutt, J. W., & Jordan, N. R. (2017). Sneeze to leave: African wild dogs  
795 (*Lycaon pictus*) use variable quorum thresholds facilitated by sneezes in collective decisions.  
796 *Proceedings of the Royal Society B: Biological Sciences*, 284, 20170347. DOI:  
797 10.1098/rspb.2017.0347
- 798 Watts, D. P. (2000). Mountain gorilla habitat use strategies and group movements. In S. Boinski, & P.  
799 A. Garber (Eds.), *On the Move: How and Why Animals Travel in Groups* (pp. 351–374). Chicago:  
800 University of Chicago Press.
- 801 Westley, P. A. H., Berdahl, A. M., Torney, C. J., & Biro, D. (2018). Collective movement in ecology:  
802 from emerging technologies to conservation and management. *Philosophical Transactions of the*  
803 *Royal Society B: Biological Sciences*, 373, 20170004. DOI: 10.1098/rstb.2017.0004
- 804
